# Supplementary material for: A Circular RNA Expressed from the FAT3 Locus Regulates Neural Development
Source: PubMed Central journal article supplement (PMC10122638; doi:10.1007/s12035-023-03253-7), 2023-02-25

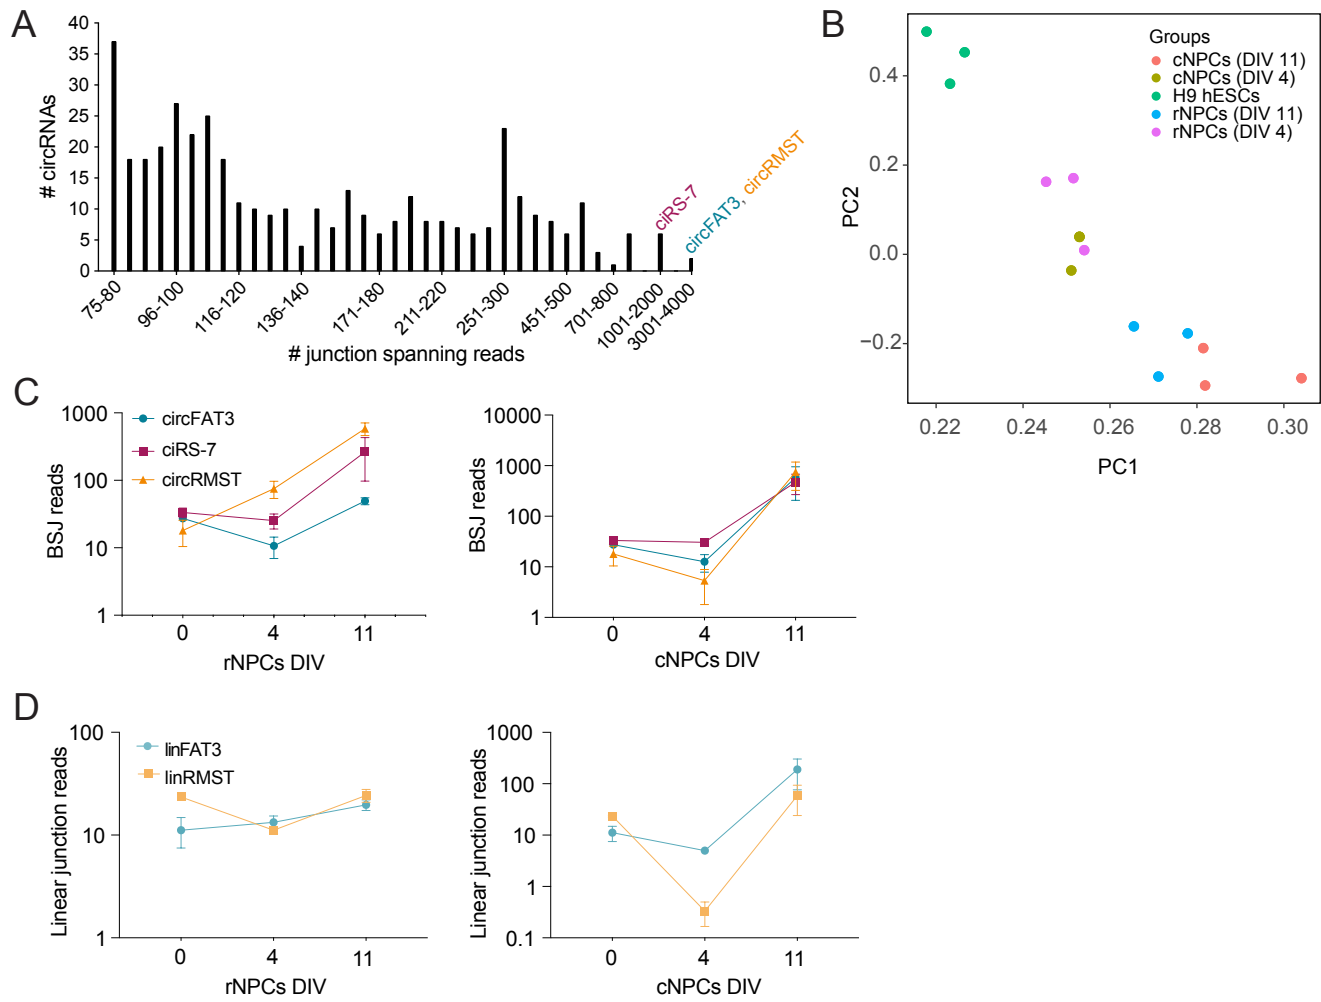

**Figure S1**



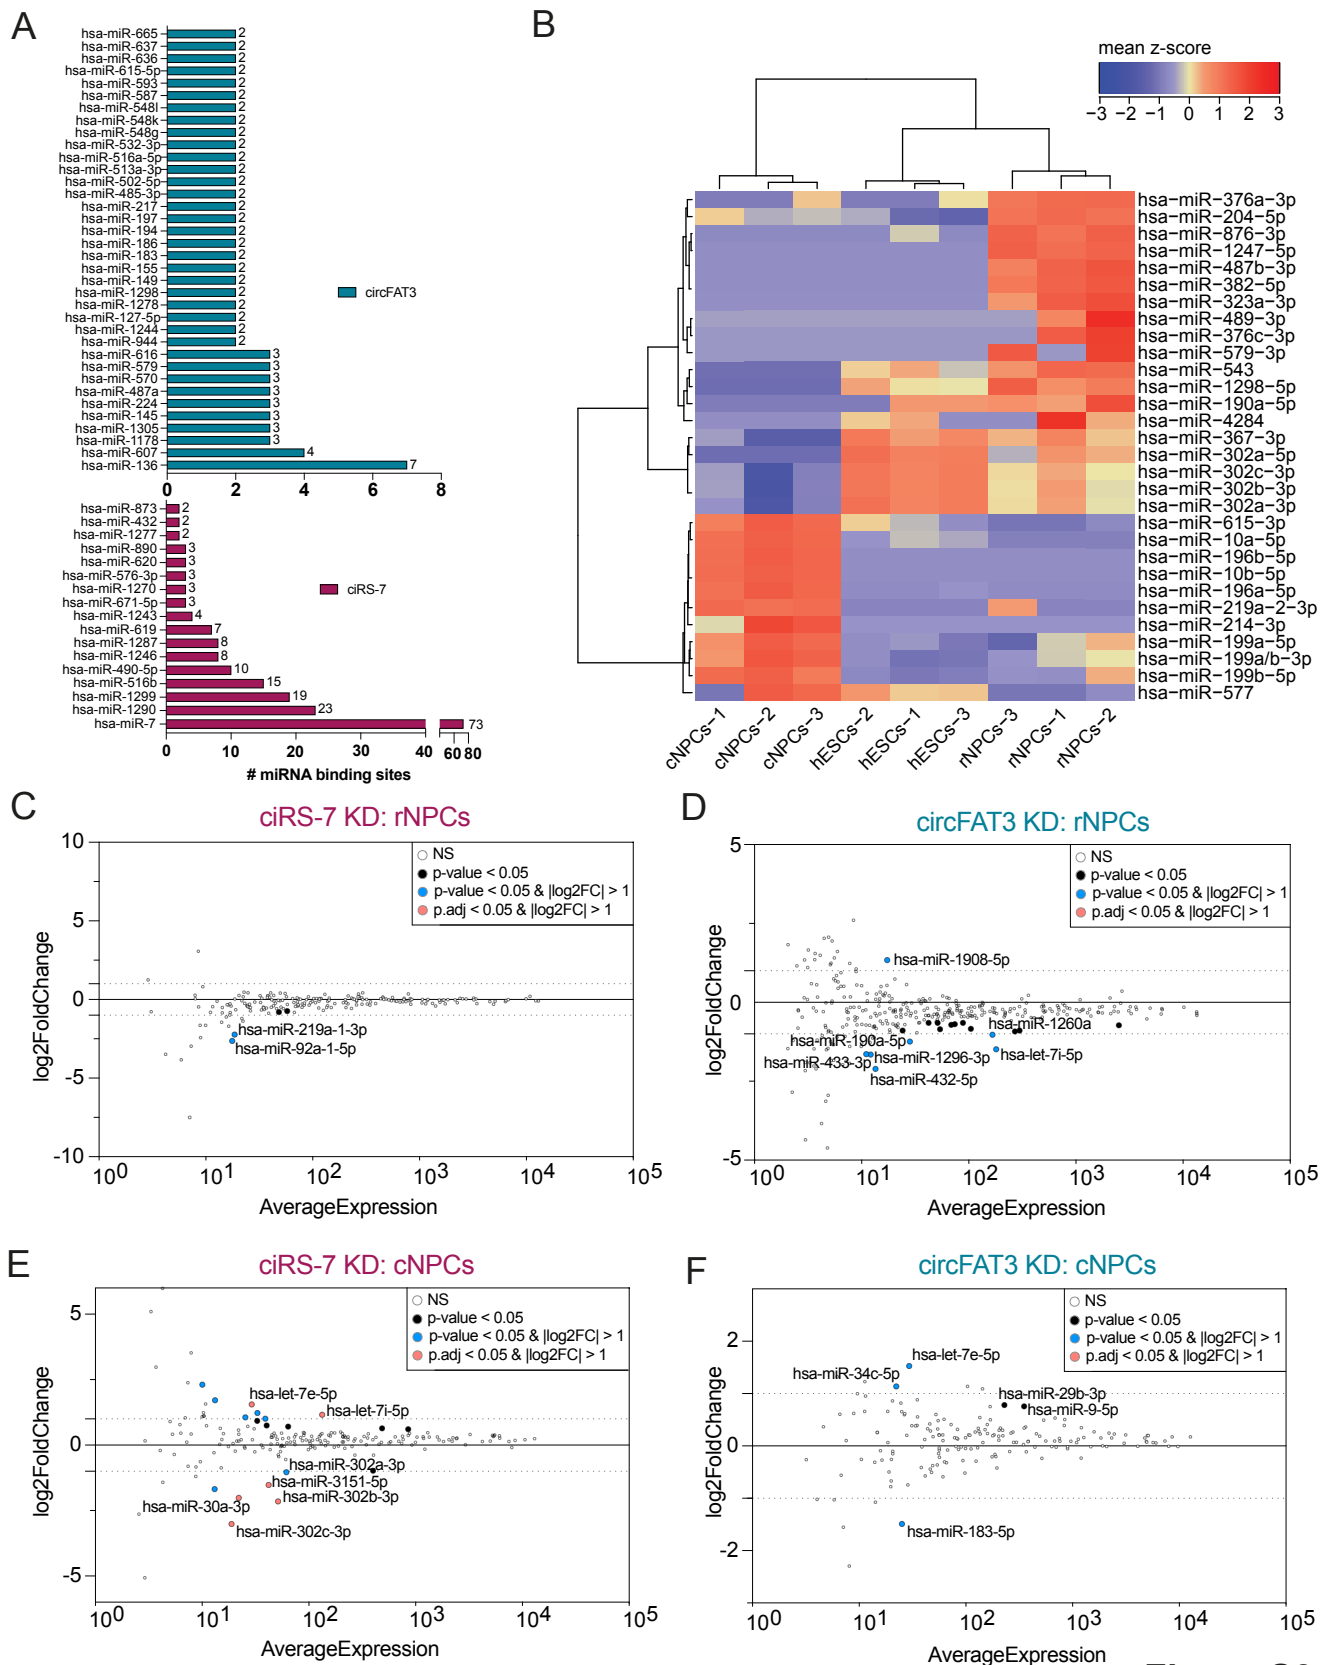

**Figure S3**

**A** Cerebral organoids: Day 30 CTRL

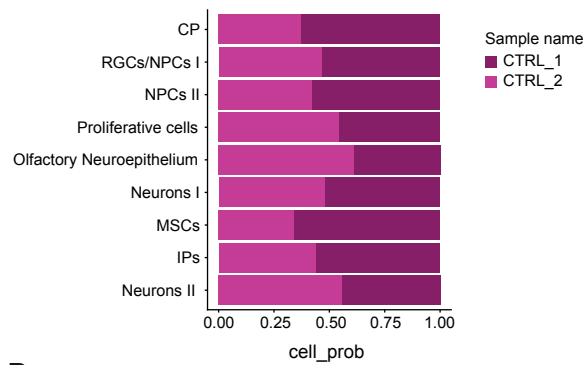

**B** Cerebral organoids: Day 90 CTRL

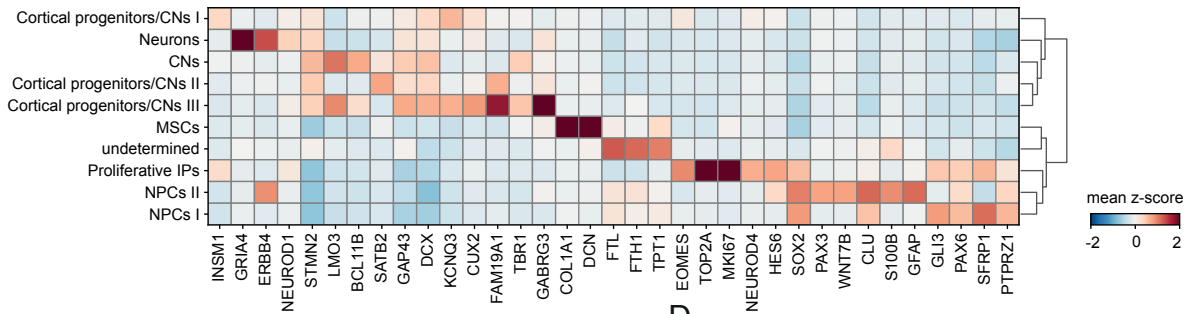

**C**

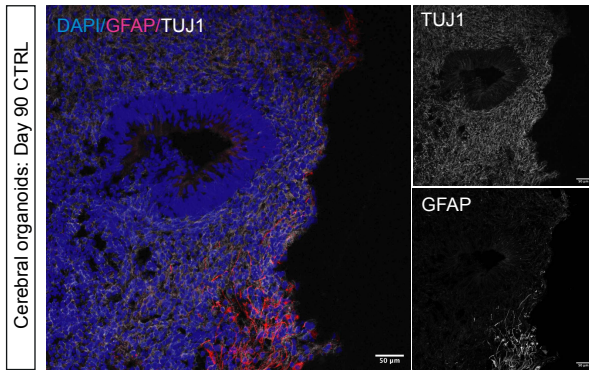

**D**

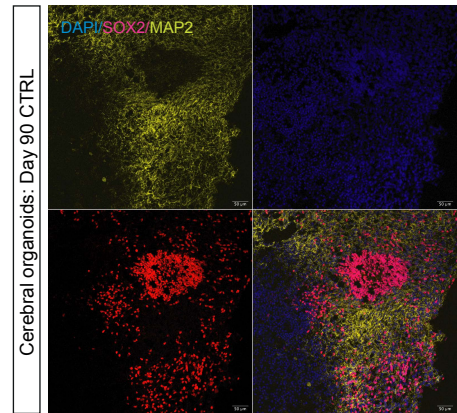

**E**

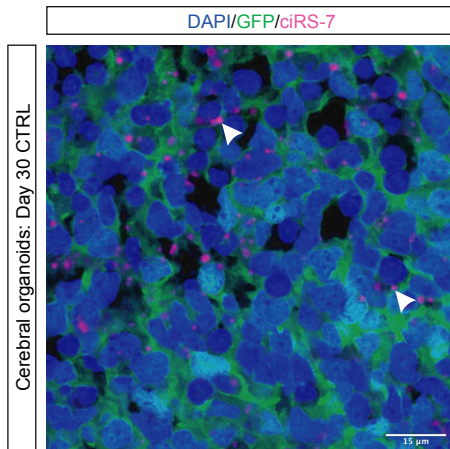

**F**

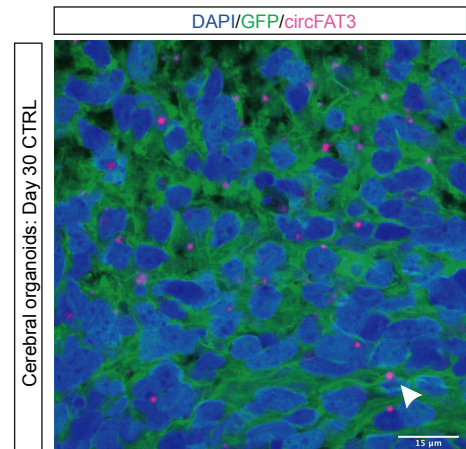

**Figure S4**

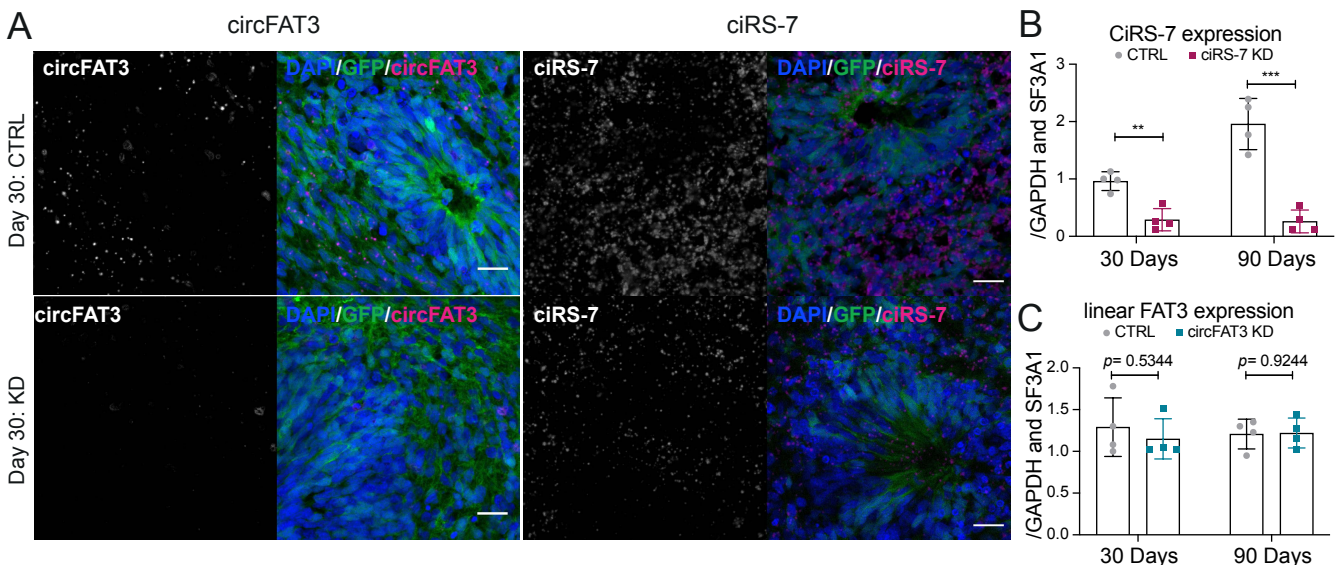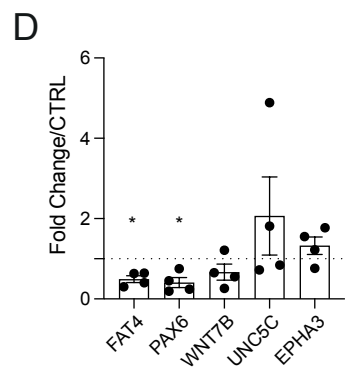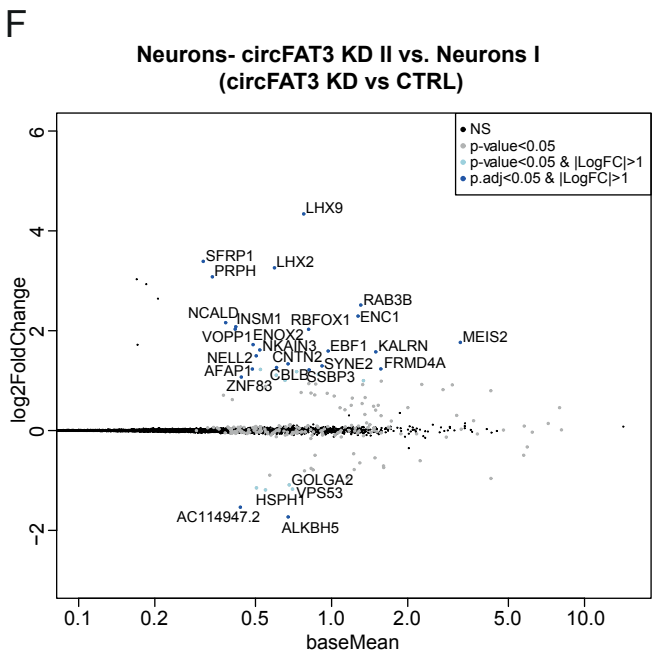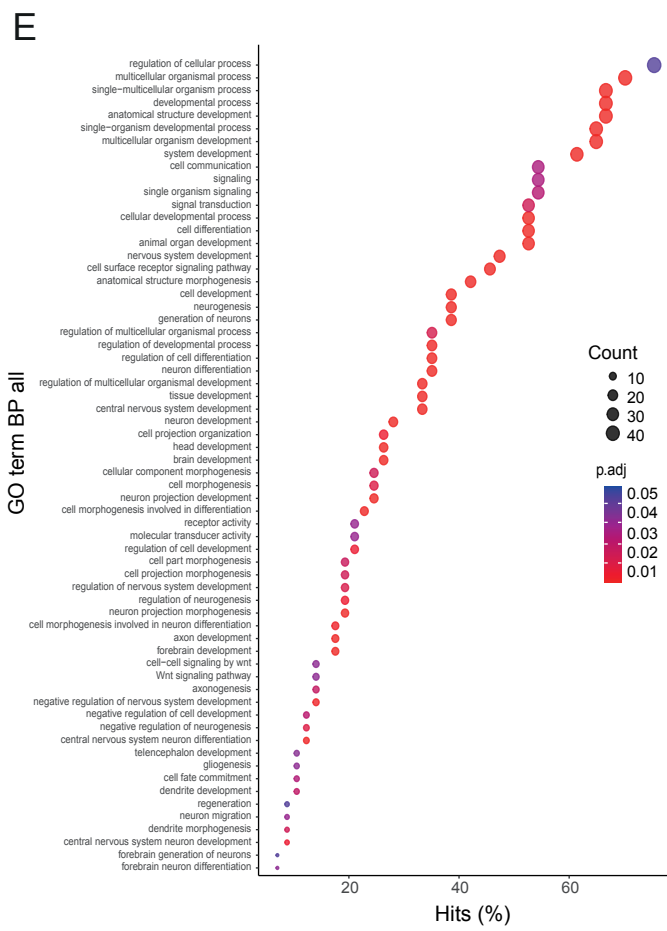

**Figure S5**

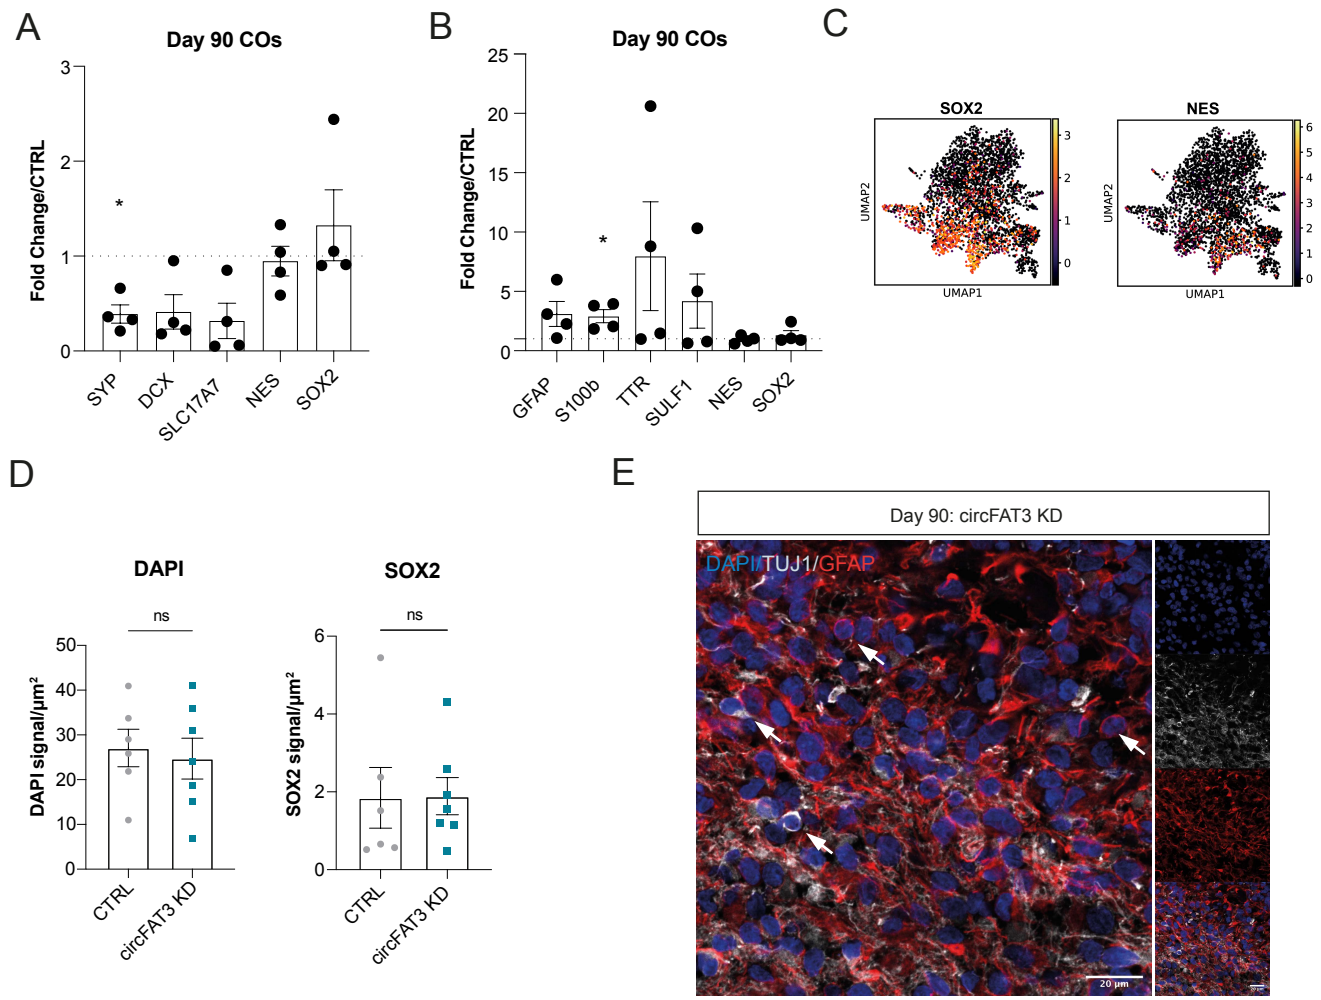

Figure S6

**A**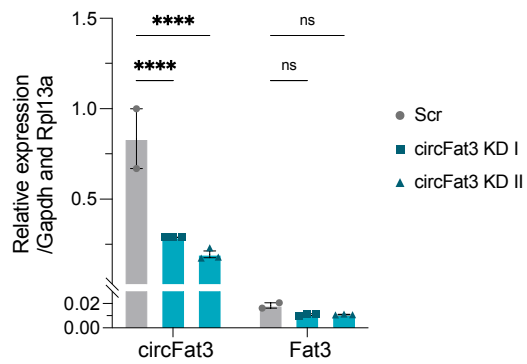**B**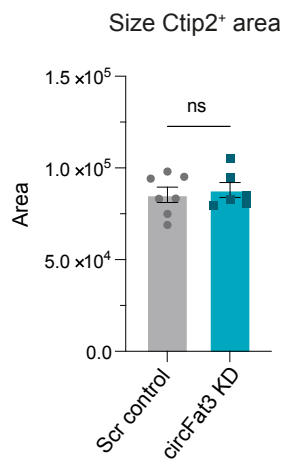

Supplement: 12035_2023_3253_MOESM2_ESM.pdf [file 12035_2023_3253_MOESM2_ESM.pdf]
